# Supplementary material for: Crystallography of hydrogen-containing compounds: realizing the potential of neutron powder diffraction
Source: Royal Society of Chemistry journal article supplement (doi:10.1039/b821336d), 2009-01-01
Supplement: b821336d.pdf [file b821336d.pdf]

## Crystallography of hydrogen-containing compounds: realizing the potential of neutron powder diffraction

Mark T. Weller, Paul F. Henry, Valeska P. Ting and Chick C. Wilson

Refined fractional coordinates for  $\text{Bi}(\text{NO}_3)_3 \cdot 5\text{H}_2\text{O}$  from NPD data ( $P-1$ ,  $a = 6.41605(22) \text{ \AA}$ ,  $b = 8.58647(28) \text{ \AA}$ ,  $c = 10.6268(4) \text{ \AA}$ ,  $\alpha = 100.1569(18)^\circ$ ,  $\beta = 80.9292(18)^\circ$ ,  $\gamma = 104.6216(16)^\circ$ ,  $V = 553.656(33) \text{ \AA}^3$ )

| Atom | x           | y          | z          | U <sub>i</sub> /U <sub>e</sub> *100<br>( $\text{\AA}^2$ ) |
|------|-------------|------------|------------|-----------------------------------------------------------|
| Bi1  | 0.1860(10)  | 0.3503(6)  | 0.2334(5)  | 0.76(18)                                                  |
| N1   | 0.0958(9)   | 0.6623(7)  | 0.2050(6)  | 1.34(8)                                                   |
| O1   | 0.1487(16)  | 0.5762(12) | 0.1007(9)  | 1.14(9)                                                   |
| O2   | 0.0937(14)  | 0.6091(11) | 0.3082(8)  | 1.14(9)                                                   |
| O3   | 0.0606(16)  | 0.8029(12) | 0.2022(9)  | 1.14(9)                                                   |
| N2   | -0.1645(9)  | 0.1771(7)  | 0.4154(5)  | 1.34(8)                                                   |
| O4   | -0.1628(14) | 0.3214(12) | 0.4005(10) | 1.14(9)                                                   |
| O5   | -0.0247(16) | 0.1071(11) | 0.3503(8)  | 1.14(9)                                                   |
| O6   | -0.3107(15) | 0.1095(11) | 0.4981(8)  | 1.14(9)                                                   |
| N3   | 0.3330(9)   | 0.1626(7)  | -0.0428(5) | 1.34(8)                                                   |
| O7   | 0.3604(15)  | 0.3140(12) | -0.0020(9) | 1.14(9)                                                   |
| O8   | 0.2274(14)  | 0.0636(11) | 0.0292(8)  | 1.14(9)                                                   |
| O9   | 0.4116(13)  | 0.1116(11) | -0.1592(9) | 1.14(9)                                                   |
| O10  | 0.5268(15)  | 0.5272(12) | 0.2069(9)  | 0.35(9)                                                   |
| O11  | 0.2860(14)  | 0.4409(12) | 0.4344(8)  | 0.35(9)                                                   |
| O12  | 0.4373(17)  | 0.1838(13) | 0.2569(9)  | 0.35(9)                                                   |
| O13  | 0.8355(15)  | 0.2525(12) | 0.1042(9)  | 0.35(9)                                                   |
| O14  | 0.6796(14)  | 0.7662(12) | 0.4058(9)  | 0.35(9)                                                   |
| H1   | 0.5632(28)  | 0.6066(20) | 0.2838(17) | 2.63(15)                                                  |
| H2   | 0.8389(24)  | 0.3166(20) | 0.0406(17) | 2.63(15)                                                  |
| H3   | 0.5598(28)  | 0.5689(18) | 0.1327(17) | 2.63(15)                                                  |
| H4   | 0.2339(28)  | 0.5232(20) | 0.4930(16) | 2.63(15)                                                  |
| H5   | 0.8031(26)  | 0.8269(19) | 0.3702(15) | 2.63(15)                                                  |
| H6   | 0.8370(24)  | 0.1424(21) | 0.0470(17) | 2.63(15)                                                  |
| H7   | 0.4068(27)  | 0.0816(23) | 0.2380(17) | 2.63(15)                                                  |
| H8   | 0.5828(28)  | 0.2139(19) | 0.2151(16) | 2.63(15)                                                  |
| H9   | 0.3056(24)  | 0.3623(20) | 0.4896(17) | 2.63(15)                                                  |
| H10  | 0.5691(26)  | 0.8247(21) | 0.4493(16) | 2.63(15)                                                  |

Selected bond lengths and angles for  $\text{Bi}(\text{NO}_3)_3 \cdot 5\text{H}_2\text{O}$  from NPD data

| Bond    | Length    | Bond    | Length    |
|---------|-----------|---------|-----------|
| Bi1_O1  | 2.666(11) | O10_H1  | 0.985(22) |
| Bi1_O2  | 2.411(10) | O10_H3  | 0.896(24) |
| Bi1_O4  | 2.617(12) | O11_H4  | 0.947(23) |
| Bi1_O5  | 2.587(10) | O11_H9  | 1.010(22) |
| Bi1_O7  | 2.573(11) | O12_H7  | 0.844(26) |
| Bi1_O10 | 2.334(11) | O12_H8  | 0.961(23) |
| Bi1_O11 | 2.275(10) | O13_H2  | 0.938(22) |
| Bi1_O12 | 2.475(11) | O13_H6  | 1.031(24) |
| Bi1_O13 | 2.695(11) | O14_H5  | 0.900(21) |
|         |           | O14_H10 | 0.982(20) |
| N1_O2   | 1.257(11) |         |           |
| N1_O3   | 1.288(11) |         |           |
| N2_O4   | 1.273(11) |         |           |
| N2_O5   | 1.255(10) |         |           |
| N2_O6   | 1.279(10) |         |           |
| N3_O7   | 1.272(10) |         |           |
| N3_O8   | 1.242(10) |         |           |
| N3_O9   | 1.304(11) |         |           |

  

| Bond       | Angle (deg) |
|------------|-------------|
| H1_O10_H3  | 114.5(15)   |
| H2_O13_H6  | 99.6(15)    |
| H5_O14_H10 | 116.3(16)   |
| H7_O12_H8  | 102.5(16)   |

Refined fractional coordinates for La acetate sesquihydrate from NPD data ( $a = 8.54367(28)\text{\AA}$ ,  $b = 10.02365(34)\text{\AA}$ ,  $c = 13.3359(5)\text{\AA}$ ,  $\alpha = 87.5147(20)^\circ$ ,  $\beta = 76.3247(22)^\circ$ ,  $\gamma = 75.4844(20)^\circ$ )<sup>1</sup>

| <b>Bond</b> | <b>Length (Å)</b> | <b>Bond</b> | <b>Length (Å)</b>  |
|-------------|-------------------|-------------|--------------------|
| La1 - O4    | 2.5095(16)        | La2 - O2    | 2.5524(18)         |
| O4 - C3     | 1.2725(27)        | O2 - C1     | 1.2795(29)         |
| C3 - O3     | 1.2668(28)        | C1 - O1     | 1.2671(29)         |
| C3 - C4     | 1.4864(32)        | C1 - C2     | 1.485(4)           |
| C4 - H4A    | 1.0500(26)        | C2 - H2A    | 1.0485(26)         |
| C4 - H4B    | 1.0524(26)        | C2 - H2B    | 1.0495(26)         |
| C4 - H4C    | 1.0485(26)        | C2 - H2C    | 1.0492(26)         |
| La1 - O11   | 2.6369(16)        | La2 - O6    | 2.5573(17)         |
| La1 - O11'  | 2.4702(17)        | O6 - C5     | 1.2512(28)         |
| O11 - C9    | 1.2812(29)        | C5 - O5     | 1.2705(27)         |
| C9 - O10    | 1.2520(29)        | C5 - C6     | 1.4957(32)         |
| C9 - C10    | 1.4945(31)        | C6 - H6A    | 1.0494(26)         |
| C10 - H8A   | 1.0493(26)        | C6 - H6B    | 1.0515(26)         |
| C10 - H8B   | 1.0488(26)        | C6 - H6C    | 1.0508(26)         |
| C10 - H8C   | 1.0490(26)        |             |                    |
| La1 - O12   | 2.6201(16)        | La2 - O9    | 2.7367(18)         |
| La1 - O12'  | 2.4842(17)        | La2 - O9'   | 2.5573(16)         |
| O12 - C11   | 1.2825(28)        | O9 - C7     | 1.2684(27)         |
| C11 - O8    | 1.2538(29)        | C7 - O7     | 1.2741(29)         |
| C11 - C12   | 1.4993(31)        | C7 - C8     | 1.489(4)           |
| C12 - H12A  | 1.0502(26)        | C8 - H8A    | 1.0510(26)         |
| C12 - H12B  | 1.0490(26)        | C8 - H8B    | 1.0496(26)         |
| C12 - H12C  | 1.0496(26)        | C8 - H8C    | 1.0481(26)         |
| La1 ... OW2 | 2.5137(18)        |             |                    |
| OW2 - H1    | 1.029(16)         | <b>Bond</b> | <b>Angle (deg)</b> |
| OW2 - H2    | 0.992(16)         | H2-OW2-     | 107.3(12)          |
| La2 ... OW1 | 2.5132(18)        | H4-OW1-     | 105.6(13)          |
| OW1 - H3    | 0.971(16)         | H6-OW3-     | 107.5(13)          |
| OW1 - H4    | 0.980(16)         |             |                    |
| La2 ... OW3 | 4.3484(18)        |             |                    |
| OW3 - H5    | 1.020(16)         |             |                    |
| OW3 - H6    | 0.913(15)         |             |                    |

<sup>1</sup> NB: Atoms O11 and O11', O12 and O12' are related by the P-1 inversion centre.

Comparison of refined bond lengths for the atoms in Zeise's salt from (a) NPD data ( $P2_1/c$ ,  $a = 11.1378(4)$  Å,  $b = 8.2444(3)$  Å,  $c = 9.4749(3)$  Å,  $\beta = 106.5041(23)^\circ$ ,  $V = 834.19(5)$  Å<sup>3</sup>) and (b) SND ( $P2_1/c$ ,  $a = 11.212(3)$  Å,  $b = 8.424(6)$  Å,  $c = 9.696(6)$  Å,  $\beta = 107.52(4)^\circ$ )

| Atoms          | Distance / Å |           |
|----------------|--------------|-----------|
|                | NPD          | SXD       |
| Pt-Cl(1) Trans | 2.343(4)     | 2.340(2)  |
| Pt-Cl(2) Cis   | 2.317(6)     | 2.302 (2) |
| Pt-Cl(3) Cis   | 2.287(6)     | 2.303(2)  |
| Pt-C(1)        | 2.125(5)     | 2.128 (3) |
| Pt-C(2)        | 2.155(5)     | 2.135(3)  |
| C(1)-H(1)      | 1.131(12)    | 1.096(7)  |
| C(1)-H(2)      | 1.112(12)    | 1.087(7)  |
| C(2)-H(3)      | 1.064(12)    | 1.079(8)  |
| C(2)-H(4)      | 1.047(13)    | 1.086(8)  |
| O-H(5)         | 1.005(13)    | 0.975(9)  |
| O-H(6)         | 1.025(14)    | 0.940(8)  |
| H(5)....Cl(2)  | 2.214(11)    | 2.288(8)  |
| H(6)...Cl(3)   | 2.266(12)    | 2.380(8)  |
| K---Cl(1)      | 3.538(8)     | 3.768(5)  |
| K---Cl(1)'     | 3.207(8)     | 3.237(5)  |
| K---Cl(1)''    | 3.179(8)     | 3.236(5)  |
| K---Cl(1)'''   | 3.408(8)     | 3.397(5)  |
| K---Cl(2)      | 3.234(8)     | 3.299(5)  |
| K---Cl(3)      | 3.102(8)     | 3.199(5)  |
| K---O          | 2.767(9)     | 2.761(6)  |
| K---O'         | 2.714(10)    | 2.798(6)  |
| Cl(1)-Pt-Cl(2) | 89.71(19)    | 90.05(8)  |
| Cl(1)-Pt-Cl(3) | 90.28(20)    | 90.43(8)  |
| Cl(2)-Pt-Cl(3) | 177.07(20)   | 177.65(9) |
| C(1)-Pt-C(2)   | 37.94(16)    | 37.6(1)   |
| Pt-C(1)-C(2)   | 72.2(3)      | 71.4(2)   |
| Pt-C(2)-C(1)   | 69.9(3)      | 70.9(2)   |
| H(1)-C(1)-H(2) | 117.3(7)     | 115.2(5)  |
| H(1)-C(1)-C(2) | 120.8(7)     | 121.7(4)  |
| H(2)-C(1)-C(2) | 120.7(7)     | 120.6(4)  |
| H(3)-C(2)-H(4) | 119.0(7)     | 114.6(6)  |
| H(3)-C(2)-C(1) | 118.3(8)     | 121.2(5)  |
| H(4)-C(2)-C(1) | 120.9(8)     | 120.8(5)  |
| H(5)-O-H(6)    | 100.9(9)     | 103.6(6)  |
| O-H(5)---Cl(2) | 162.8(10)    | 161.6(7)  |
| O-H(6)--Cl(3)  | 177.0(9)     | 179.4(7)  |
| Pt-Cl(2)--H(5) | 100.4(4)     | 103.6(2)  |
| Pt-Cl(3)--H(6) | 102.1(3)     | 102.5(2)  |
